# Supplementary material for: Mutation bias and adaptation in bacteria
Source: PubMed Central journal article supplement (PMC10710837; doi:10.1099/mic.0.001404), 2023-11-09
Supplement: mic-169-1404-s001.pdf [file mic-169-1404-s001.pdf]

**Supplementary Table S1. Details of publications demonstrating growth phase and other environmental stressor's effect on mutagenic mechanisms.**

| Mutagenic feature:                           | Growth phase when most active:                                                                                                                                                                | Demonstrated in:                                                                              | Ref:                         | NGSR stimulus:                                                                                                                                                                    | Demonstrated in:                                                                                                 | Ref:                                 |
|----------------------------------------------|-----------------------------------------------------------------------------------------------------------------------------------------------------------------------------------------------|-----------------------------------------------------------------------------------------------|------------------------------|-----------------------------------------------------------------------------------------------------------------------------------------------------------------------------------|------------------------------------------------------------------------------------------------------------------|--------------------------------------|
| Replication infidelity over genomic position | Log (replication predominantly occurs during log phase)                                                                                                                                       | <i>P. fluorescens (ATCC948)</i> , <i>V. fischeri</i> , <i>V. cholerae</i> , <i>E. coli</i>    | [1]<br>[2]<br>[3]            | Increased dNTP pools associated with wave-like mutation rates via genomic modifications. However, ultra-violet irradiation has been shown to increase dNTP pools and mutagenesis. | <i>V. fischeri</i> and <i>V. cholerae</i> , <i>E. coli</i> ; also demonstrated in yeast.                         | [2]<br>[4]<br>[5]                    |
| Absence of mismatch repair genes             | Log (MMR primarily active during DNA replication and recombination)                                                                                                                           | <i>E. coli</i>                                                                                | [6]                          | Antibiotic (norfloxacin)                                                                                                                                                          | <i>E. coli (K-12)</i> – increases mutation rate in MMR- strains, and increases transversion bias in MMR+ strains | [7]                                  |
| Nucleoid-associated DNA topology             | Log (Suggested by: argued to interfere with DNA repair proteins active in log phase; and inference that DNA replication becomes inaccurate in regions of high superhelical density)           | <i>B. subtilis</i> , <i>Escherichia (various species)</i> , <i>Shigella (various species)</i> | [8]<br>[9]                   |                                                                                                                                                                                   |                                                                                                                  |                                      |
| Cytosine deamination                         | Log and stationary (the periods of high replication and transcription)                                                                                                                        |                                                                                               | [10]<br>[11]<br>[12]         | High temperature                                                                                                                                                                  | Ex vivo                                                                                                          | [13]                                 |
| Dcm methylation                              | Stationary (suggested by: M9 minimal media + 96-hour samples having more methylation; also, strong expression control of genes by methylation in stationary phase over log phase observed).   | <i>E. coli (strains SC419 and SC452, also various from ECOR)</i>                              | [14]<br>[15]<br>[16]<br>[17] | Temperature                                                                                                                                                                       | <i>E. coli</i> (high temp: strain <i>SC419</i> , low temp: strain <i>SC452</i> )                                 | [14]                                 |
| 8-oxoguanine formation                       | Stationary onward (Reactive oxygen species accumulate during growth, resulting in increased amounts of 8-oxo-guanine that continues to cause mispairing in non-dividing cells persisting with | <i>E. coli</i>                                                                                | [18]<br>[19]                 | Hydrogen peroxide (this engages the general stress response but can also change the expression of other stress response pathways, e.g. OxyR and heat shock proteins).             | <i>E. coli</i> , <i>S. enterica</i>                                                                              | [20]<br>[18]<br>[21]<br>[22]<br>[23] |

|                      |                                           |                                       |      |                        |                                 |              |
|----------------------|-------------------------------------------|---------------------------------------|------|------------------------|---------------------------------|--------------|
|                      | transcription later in the growth cycle.) |                                       |      |                        |                                 |              |
| Transposition events | Stationary and death                      | <i>P. putida</i><br>( <i>Tn4652</i> ) | [24] | Iron/oxygen deficiency | <i>E. coli</i> ( <i>IS150</i> ) | [25]<br>[26] |

## **References:**

1. **Long H, Sung W, Miller SF, Ackerman MS, Doak TG, et al.** Mutation rate, spectrum, topology, and context-dependency in the DNA mismatch repair-deficient *Pseudomonas fluorescens* ATCC948. *Genome Biol Evol* 2014;7:262–271.
2. **Dillon MM, Sung W, Lynch M.** Periodic Variation of Mutation Rates in Bacterial Genomes. *mBio* 2018;9:1–15.
3. **Zhang X, Zhang X, Zhang X, Liao Y, Song L, et al.** Spatial Vulnerabilities of the *Escherichia coli* Genome. *Genetics* 2018;210:547–558.
4. **Watt DL, Buckland RJ, Lujan SA, Kunkel TA, Chabes A.** Genome-wide analysis of the specificity and mechanisms of replication infidelity driven by imbalanced dNTP pools. *Nucleic Acids Res* 2015;44:1669–1680.
5. **Gon S, Napolitano R, Rocha W, Coulon S, Fuchs RP.** Increase in dNTP pool size during the DNA damage response plays a key role in spontaneous and induced-mutagenesis in *Escherichia coli*. *Proc Natl Acad Sci U S A* 2011;108:19311–19316.
6. **Li G-M.** Mechanisms and functions of DNA mismatch repair. *Cell Res* 2008;18:85–98.
7. **Long H, Miller SF, Strauss C, Zhao C, Cheng L, et al.** Antibiotic treatment enhances the genome-wide mutation rate of target cells. *Proc Natl Acad Sci* 2016;113:E2498–E2505.
8. **Warnecke T, Supek F, Lehner B.** Nucleoid-Associated Proteins Affect Mutation Dynamics in *E. coli* in a Growth Phase-Specific Manner. *PLoS Comput Biol*;8. Epub ahead of print 2012. DOI: 10.1371/journal.pcbi.1002846.
9. **Niccum BA, Lee H, Mohammedismail W, Tang H.** The Symmetrical Wave Pattern of Base-Pair Substitution Rates across the *Escherichia coli* Chromosome Has Multiple Causes. *mBio*;10.
10. **Bhagwat AS, Hao W, Townes JP, Lee H, Tang H, et al.** Strand-biased cytosine deamination at the replication fork causes cytosine to thymine mutations in *Escherichia coli*. *Proc Natl Acad Sci U S A* 2016;113:2176–2181.
11. **Francino MP, Ochman H.** Deamination as the Basis of Strand-Asymmetric Evolution in Transcribed *Escherichia coli* Sequences. *Mol Biol Evol* 2001;18:1147–1150.
12. **Beletskii A, Bhagwat AS.** Transcription-induced mutations: Increase in C to T mutations in the nontranscribed strand during transcription in *Escherichia coli*. *Proc Natl Acad Sci U S A* 1996;93:13919–13924.

13. **Lewis CA, Crayle J, Zhou S, Swanstrom R, Wolfenden R.** Cytosine deamination and the precipitous decline of spontaneous mutation during Earth's history. *Proc Natl Acad Sci* 2016;113:8194–8199.
14. **Breckell GL, Silander OK.** Growth condition-dependent differences in methylation imply transiently differentiated DNA methylation states in *Escherichia coli*. *G3 Genes Genomes Genetics* 2023;13:jkac310.
15. **Cherry JL.** Methylation-Induced Hypermutation in Natural Populations of Bacteria. *J Bacteriol* 2018;200:e00371-18.
16. **Militello KT, Simon RD, Qureshi M, Maines R, Van Horne ML, et al.** Conservation of Dcm-mediated Cytosine DNA Methylation in *Escherichia coli*. *FEMS Microbiol Lett* 2012;328:78–85.
17. **Kahramanoglou C, Prieto AI, Khedkar S, Haase B, Gupta A, et al.** Genomics of DNA cytosine methylation in *Escherichia coli* reveals its role in stationary phase transcription. *Nat Commun* 2012;3:886.
18. **Alhama J, Ruiz-Laguna J, Rodriguez-Ariza A, Toribio F, López-Barea J, et al.** Formation of 8-oxoguanine in cellular DNA of *Escherichia coli* strains defective in different antioxidant defences. *Mutagenesis* 1998;13:589–594.
19. **Sekowska A, Wendel S, Fischer EC, Nørholm MHH.** Generation of mutation hotspots in ageing bacterial colonies. *Sci Rep* 2016;6:4–10.
20. **Battesti A, Majdalani N, Gottesman S.** The RpoS-Mediated General Stress Response in *Escherichia coli*. *Annu Rev Microbiol* 2011;65:189.
21. **Storz G, Spiro S.** Sensing and Responding to Reactive Oxygen and Nitrogen Species. In: *Bacterial Stress Responses*. John Wiley & Sons, Ltd. pp. 157–173.
22. **Fulda S, Gorman AM, Hori O, Samali A.** Cellular Stress Responses: Cell Survival and Cell Death. *Int J Cell Biol* 2010;2010:214074.
23. **Fasnacht M, Polacek N.** Oxidative Stress in Bacteria and the Central Dogma of Molecular Biology. *Front Mol Biosci*;8. <https://www.frontiersin.org/articles/10.3389/fmolb.2021.671037> (2021, accessed 22 March 2023).
24. **Ilves H, Hōrak R, Kivisaar M.** Involvement of  $\zeta$ S in Starvation-Induced Transposition of *Pseudomonas putida* Transposon Tn4652. *J Bacteriol* 2001;183:5445–5448.
25. **Maharjan RP, Ferenci T.** A shifting mutational landscape in 6 nutritional states: Stress-induced mutagenesis as a series of distinct stress input–mutation output relationships. *PLoS Biol*;15. Epub ahead of print June 2017. DOI: 10.1371/journal.pbio.2001477.
26. **Shewaramani S, Finn TJ, Leahy SC, Kassen R, Rainey PB, et al.** Anaerobically Grown *Escherichia coli* Has an Enhanced Mutation Rate and Distinct Mutational Spectra. *PLOS Genet* 2017;13:e1006570.
